# Supplementary material for: Growth of large sized two-dimensional MoS2 flakes in aqueous solution
Source: Royal Society of Chemistry journal article supplement (doi:10.1039/c7nr00701a), 2017-01-01
Supplement: c7nr00701a1.pdf [file c7nr00701a1.pdf]

## Supplementary Information

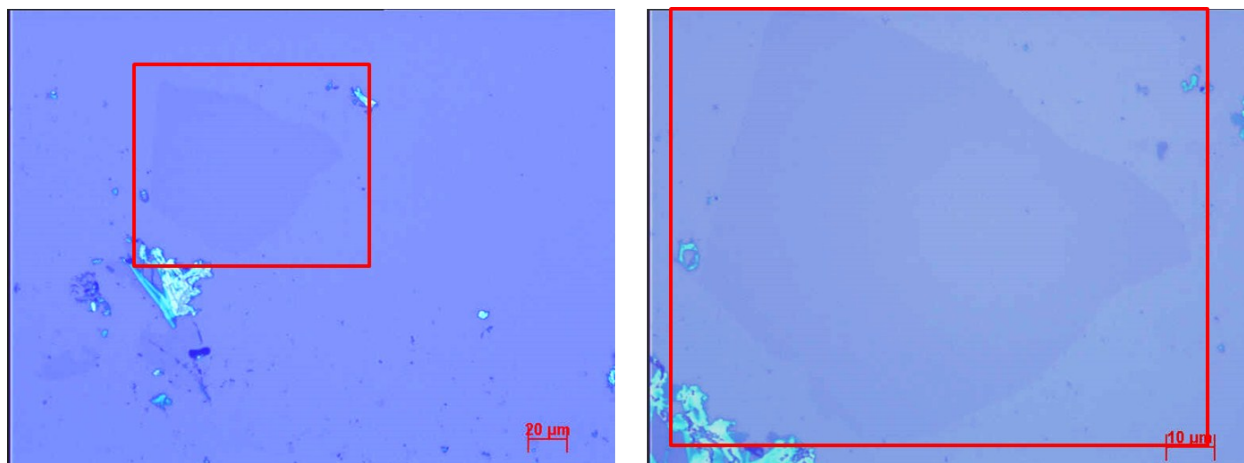

Figure 1 Optical images of before & after annealing on the same flake: a) before annealing, b) after annealing.

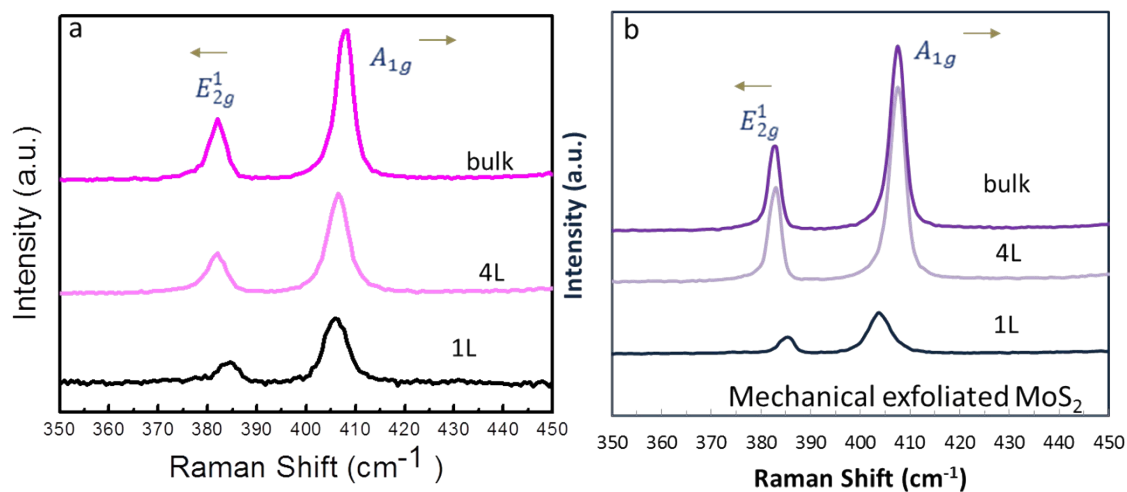

Figure 2 Raman spectra of ML, 4L and bulk MoS<sub>2</sub> obtained a) this work, b) mechanical exfoliation.
